# Supplementary material for: The prognostic significance of circulating tumor cells in head and neck and non‐small‐cell lung cancer
Source: PubMed Central journal article supplement (PMC6308060; doi:10.1002/cam4.1832), 2018-11-22

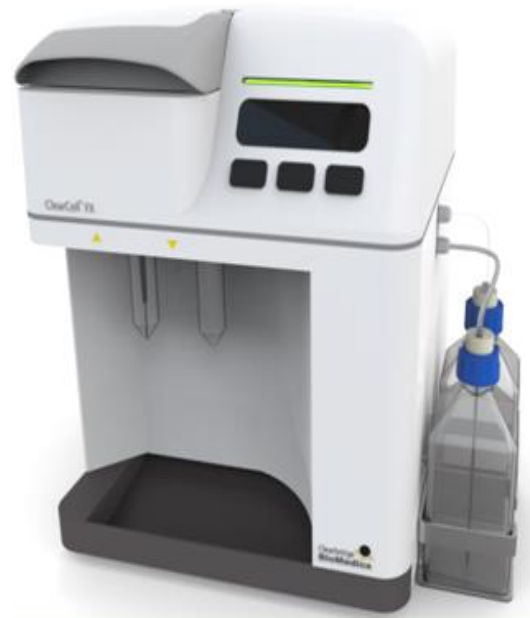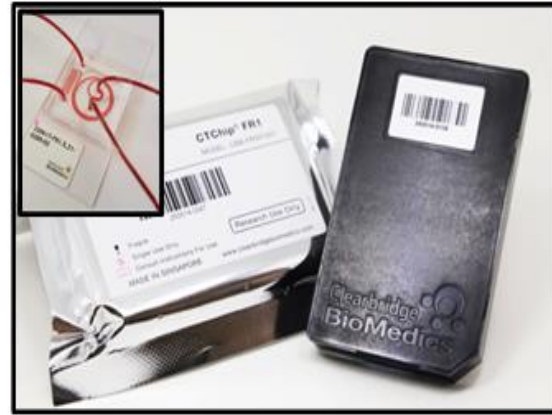

Supplement: CAM4-7-5910-s001.pdf [file CAM4-7-5910-s001.pdf]
